# Supplementary material for: Homogeneous catalyst modifier for alkyne semi-hydrogenation: systematic screening in an automated flow reactor and computational study on mechanisms
Source: Royal Society of Chemistry journal article supplement (doi:10.1039/d2re00147k), 2022-01-01
Supplement: d2re00147k1.pdf [file d2re00147k1.pdf]

## Supporting Information

### Homogeneous catalyst modifier for alkyne semi-hydrogenation: systematic screening in an automated flow reactor and computational study on mechanisms

Shusaku Asano, Samuel J Adams, Yuta Tsuji, Kazunari Yoshizawa, Atsushi Tahara, Jun-ichiro Hayashi,  
Nikolay Cherkasov

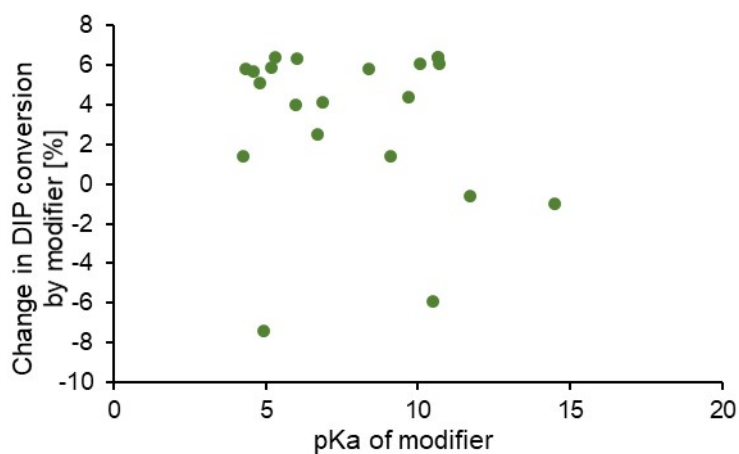

Figure S1. Change in DIP conversion at 3 mL/min and pKa value of modifiers

**Table S1.** List of conversion and selectivity with the liquid flow rate of 3 mL/min

| Catalyst Modifier         | MBY, Pd/C     |                | MBY, Pd/ZnO   |                | DLL, Pd/ZnO   |                | DIP, Pd/ZnO   |                |
|---------------------------|---------------|----------------|---------------|----------------|---------------|----------------|---------------|----------------|
|                           | Conversion, - | Selectivity, - |
| None                      | 0.933         | 0.862          | 0.931         | 0.944          | 0.949         | 0.786          | 0.839         | 0.717          |
| Quinoline                 | 0.934         | 0.937          | 0.951         | 0.956          | 0.940         | 0.926          | 0.765         | 0.896          |
| Pyridine                  | 0.953         | 0.936          | 0.959         | 0.880          | 0.959         | 0.808          | 0.898         | 0.805          |
| 2,2'-bipyridine           | 0.959         | 0.949          | 0.962         | 0.947          | 0.951         | 0.909          | 0.897         | 0.882          |
| 1,10-phenanthroline       | 0.952         | 0.970          | 0.959         | 0.966          | 0.920         | 0.962          | 0.853         | 0.949          |
| 4,4'-bipyridine           | 0.946         | 0.956          | 0.964         | 0.940          | 0.943         | 0.913          | 0.890         | 0.886          |
| 2-phenylpyridine          | 0.949         | 0.944          | 0.958         | 0.945          | 0.950         | 0.901          | 0.903         | 0.830          |
| 2-methylpyridine          | 0.959         | 0.917          | 0.960         | 0.891          | 0.947         | 0.781          | 0.879         | 0.768          |
| 4-methylpyridine          | 0.963         | 0.912          | 0.959         | 0.899          | 0.964         | 0.798          | 0.902         | 0.792          |
| 2,4,6-trimethylpyridine   | 0.961         | 0.896          | 0.954         | 0.883          | 0.913         | 0.739          | 0.864         | 0.691          |
| 2-aminopyridine           | 0.924         | 0.857          | 0.930         | 0.848          | 0.959         | 0.822          | 0.880         | 0.862          |
| 2-hydroxypyridine         | 0.960         | 0.916          | 0.901         | 0.838          | 0.959         | 0.822          | 0.833         | 0.758          |
| 4-(dimethylamino)pyridine | 0.927         | 0.858          | 0.971         | 0.906          | 0.963         | 0.840          | 0.883         | 0.817          |
| imidazole                 | 0.898         | 0.830          | 0.974         | 0.912          | 0.952         | 0.847          | 0.829         | 0.850          |
| N-methylpiperidine        | 0.751         | 0.899          | 0.963         | 0.911          | 0.935         | 0.785          | 0.900         | 0.758          |
| 1-methylpiperazine        | 0.932         | 0.899          | 0.960         | 0.913          | 0.949         | 0.800          | 0.853         | 0.893          |
| morpholine                | 0.940         | 0.872          | 0.962         | 0.894          | 0.928         | 0.799          | 0.897         | 0.818          |
| N-methylcyclohexylamine   | 0.946         | 0.930          | 0.957         | 0.913          | 0.953         | 0.717          | 0.780         | 0.705          |
| cyclohexylamine           | 0.953         | 0.936          | 0.964         | 0.888          | 0.948         | 0.786          | 0.903         | 0.750          |
| hexylamine                | 0.891         | 0.731          | 0.958         | 0.891          | 0.941         | 0.788          | 0.903         | 0.781          |
| propylamine               | 0.834         | 0.838          | 0.967         | 0.890          | 0.941         | 0.772          | 0.900         | 0.810          |
| aniline                   | 0.941         | 0.905          | 0.969         | 0.918          | 0.943         | 0.799          | 0.896         | 0.823          |

**Table S2.** List of conversion and selectivity with the liquid flow rate of 4 mL/min

| Catalyst Modifier         | MBY, Pd/C     |                | MBY, Pd/ZnO   |                | DLL, Pd/ZnO   |                | DIP, Pd/ZnO   |                |
|---------------------------|---------------|----------------|---------------|----------------|---------------|----------------|---------------|----------------|
|                           | Conversion, - | Selectivity, - |
| None                      | 0.841         | 0.899          | 0.931         | 0.944          | 0.873         | 0.847          | 0.734         | 0.775          |
| Quinoline                 | 0.809         | 0.953          | 0.904         | 0.962          | 0.809         | 0.947          | 0.672         | 0.925          |
| Pyridine                  | 0.843         | 0.962          | 0.935         | 0.895          | 0.888         | 0.892          | 0.791         | 0.879          |
| 2,2'-bipyridine           | 0.852         | 0.971          | 0.874         | 0.969          | 0.833         | 0.959          | 0.785         | 0.925          |
| 1,10-phenanthroline       | 0.84          | 0.977          | 0.847         | 0.977          | 0.784         | 0.971          | 0.719         | 0.957          |
| 4,4'-bipyridine           | 0.825         | 0.971          | 0.867         | 0.971          | 0.816         | 0.959          | 0.766         | 0.921          |
| 2-phenylpyridine          | 0.832         | 0.967          | 0.85          | 0.971          | 0.831         | 0.958          | 0.688         | 0.916          |
| 2-methylpyridine          | 0.864         | 0.951          | 0.924         | 0.911          | 0.878         | 0.854          | 0.771         | 0.838          |
| 4-methylpyridine          | 0.873         | 0.954          | 0.939         | 0.908          | 0.888         | 0.896          | 0.79          | 0.873          |
| 2,4,6-trimethylpyridine   | 0.867         | 0.938          | 0.936         | 0.895          | 0.871         | 0.881          | 0.734         | 0.746          |
| 2-aminopyridine           | 0.843         | 0.908          | 0.911         | 0.901          | 0.835         | 0.955          | 0.775         | 0.909          |
| 2-hydroxypyridine         | 0.857         | 0.96           | 0.855         | 0.8            | 0.889         | 0.895          | 0.729         | 0.827          |
| 4-(dimethylamino)pyridine | 0.846         | 0.906          | 0.938         | 0.923          | 0.886         | 0.933          | 0.777         | 0.865          |
| imidazole                 | 0.836         | 0.903          | 0.931         | 0.941          | 0.858         | 0.933          | 0.696         | 0.885          |
| N-methylpiperidine        | 0.856         | 0.895          | 0.943         | 0.924          | 0.879         | 0.859          | 0.787         | 0.845          |
| 1-methylpiperazine        | 0.838         | 0.923          | 0.931         | 0.932          | 0.878         | 0.883          | 0.797         | 0.891          |
| morpholine                | 0.84          | 0.921          | 0.945         | 0.907          | 0.876         | 0.891          | 0.796         | 0.889          |
| N-methylcyclohexylamine   | 0.833         | 0.957          | 0.931         | 0.921          | 0.888         | 0.867          | 0.693         | 0.814          |
| cyclohexylamine           | 0.84          | 0.963          | 0.94          | 0.901          | 0.889         | 0.883          | 0.8           | 0.84           |
| hexylamine                | 0.808         | 0.917          | 0.933         | 0.88           | 0.861         | 0.858          | 0.77          | 0.847          |
| propylamine               | 0.84          | 0.878          | 0.937         | 0.913          | 0.893         | 0.876          | 0.806         | 0.879          |
| aniline                   | 0.818         | 0.93           | 0.939         | 0.922          | 0.875         | 0.889          | 0.795         | 0.889          |

**Table S3.** List of conversion and selectivity with the liquid flow rate of 5 mL/min

| Catalyst Modifier         | MBY, Pd/C     |                | MBY, Pd/ZnO   |                | DLL, Pd/ZnO   |                | DIP, Pd/ZnO   |                |
|---------------------------|---------------|----------------|---------------|----------------|---------------|----------------|---------------|----------------|
|                           | Conversion, - | Selectivity, - |
| None                      | 0.703         | 0.896          | 0.819         | 0.969          | 0.779         | 0.896          | 0.651         | 0.768          |
| Quinoline                 | 0.704         | 0.95           | 0.778         | 0.975          | 0.714         | 0.926          | 0.611         | 0.909          |
| Pyridine                  | 0.744         | 0.966          | 0.844         | 0.97           | 0.807         | 0.909          | 0.7           | 0.883          |
| 2,2'-bipyridine           | 0.742         | 0.972          | 0.737         | 0.974          | 0.727         | 0.954          | 0.694         | 0.929          |
| 1,10-phenanthroline       | 0.715         | 0.978          | 0.728         | 0.978          | 0.674         | 0.966          | 0.646         | 0.957          |
| 4,4'-bipyridine           | 0.705         | 0.971          | 0.748         | 0.971          | 0.718         | 0.954          | 0.672         | 0.926          |
| 2-phenylpyridine          | 0.71          | 0.969          | 0.73          | 0.972          | 0.717         | 0.952          | 0.696         | 0.914          |
| 2-methylpyridine          | 0.753         | 0.959          | 0.833         | 0.956          | 0.79          | 0.897          | 0.683         | 0.851          |
| 4-methylpyridine          | 0.754         | 0.962          | 0.768         | 0.959          | 0.808         | 0.911          | 0.699         | 0.878          |
| 2,4,6-trimethylpyridine   | 0.741         | 0.951          | 0.845         | 0.946          | 0.756         | 0.905          | 0.643         | 0.773          |
| 2-aminopyridine           | 0.75          | 0.93           | 0.817         | 0.967          | 0.687         | 0.889          | 0.695         | 0.903          |
| 2-hydroxypyridine         | 0.755         | 0.962          | 0.729         | 0.937          | 0.792         | 0.911          | 0.652         | 0.837          |
| 4-(dimethylamino)pyridine | 0.757         | 0.915          | 0.832         | 0.968          | 0.782         | 0.954          | 0.682         | 0.866          |
| imidazole                 | 0.724         | 0.892          | 0.83          | 0.967          | 0.762         | 0.929          | 0.62          | 0.887          |
| N-methylpiperidine        | 0.941         | 0.864          | 0.851         | 0.963          | 0.783         | 0.888          | 0.69          | 0.857          |
| 1-methylpiperazine        | 0.729         | 0.92           | 0.829         | 0.931          | 0.792         | 0.905          | 0.705         | 0.901          |
| morpholine                | 0.736         | 0.921          | 0.852         | 0.955          | 0.784         | 0.907          | 0.713         | 0.891          |
| N-methylcyclohexylamine   | 0.717         | 0.962          | 0.812         | 0.963          | 0.809         | 0.892          | 0.66          | 0.809          |
| cyclohexylamine           | 0.724         | 0.967          | 0.837         | 0.96           | 0.796         | 0.901          | 0.719         | 0.844          |
| hexylamine                | 0.719         | 0.914          | 0.851         | 0.952          | 0.776         | 0.881          | 0.7           | 0.846          |
| propylamine               | 0.735         | 0.918          | 0.834         | 0.961          | 0.799         | 0.911          | 0.721         | 0.872          |
| aniline                   | 0.732         | 0.934          | 0.84          | 0.965          | 0.781         | 0.92           | 0.694         | 0.901          |

**Table S4.** List of conversion and selectivity with the liquid flow rate of 6 mL/min

| Catalyst Modifier         | MBY, Pd/C     |                | MBY, Pd/ZnO   |                | DLL, Pd/ZnO   |                | DIP, Pd/ZnO   |                |
|---------------------------|---------------|----------------|---------------|----------------|---------------|----------------|---------------|----------------|
|                           | Conversion, - | Selectivity, - |
| None                      | 0.640         | 0.906          | 0.728         | 0.968          | 0.687         | 0.904          | 0.601         | 0.789          |
| Quinoline                 | 0.622         | 0.958          | 0.689         | 0.974          | 0.627         | 0.944          | 0.559         | 0.918          |
| Pyridine                  | 0.643         | 0.966          | 0.776         | 0.960          | 0.717         | 0.932          | 0.606         | 0.884          |
| 2,2'-bipyridine           | 0.640         | 0.968          | 0.659         | 0.974          | 0.624         | 0.943          | 0.610         | 0.923          |
| 1,10-phenanthroline       | 0.639         | 0.976          | 0.651         | 0.978          | 0.584         | 0.966          | 0.575         | 0.954          |
| 4,4'-bipyridine           | 0.609         | 0.968          | 0.672         | 0.966          | 0.622         | 0.938          | 0.599         | 0.917          |
| 2-phenylpyridine          | 0.628         | 0.967          | 0.635         | 0.971          | 0.625         | 0.934          | 0.653         | 0.760          |
| 2-methylpyridine          | 0.651         | 0.951          | 0.730         | 0.945          | 0.709         | 0.916          | 0.603         | 0.851          |
| 4-methylpyridine          | 0.653         | 0.962          | 0.739         | 0.966          | 0.692         | 0.922          | 0.613         | 0.874          |
| 2,4,6-trimethylpyridine   | 0.643         | 0.947          | 0.765         | 0.954          | 0.698         | 0.898          | 0.606         | 0.777          |
| 2-aminopyridine           | 0.669         | 0.938          | 0.754         | 0.964          | 0.667         | 0.857          | 0.603         | 0.905          |
| 2-hydroxypyridine         | 0.723         | 0.912          | 0.761         | 0.956          | 0.608         | 0.940          | 0.607         | 0.862          |
| 4-(dimethylamino)pyridine | 0.746         | 0.919          | 0.735         | 0.970          | 0.647         | 0.938          | 0.623         | 0.893          |
| imidazole                 | 0.720         | 0.693          | 0.748         | 0.967          | 0.553         | 0.908          | 0.586         | 0.881          |
| N-methylpiperidine        | 0.729         | 0.922          | 0.777         | 0.965          | 0.705         | 0.908          | 0.606         | 0.849          |
| 1-methylpiperazine        | 0.646         | 0.941          | 0.756         | 0.969          | 0.691         | 0.920          | 0.665         | 0.884          |
| morpholine                | 0.670         | 0.935          | 0.774         | 0.958          | 0.695         | 0.931          | 0.654         | 0.885          |
| N-methylcyclohexylamine   | 0.617         | 0.959          | 0.740         | 0.960          | 0.714         | 0.869          | 0.606         | 0.855          |
| cyclohexylamine           | 0.608         | 0.964          | 0.750         | 0.947          | 0.702         | 0.925          | 0.643         | 0.879          |
| hexylamine                | 0.800         | 0.930          | 0.781         | 0.963          | 0.680         | 0.895          | 0.642         | 0.858          |
| propylamine               | 0.850         | 0.870          | 0.749         | 0.968          | 0.725         | 0.928          | 0.630         | 0.887          |
| aniline                   | 0.651         | 0.939          | 0.747         | 0.963          | 0.705         | 0.922          | 0.609         | 0.893          |
